# Supplementary material for: Novel base-pairing interactions at the tRNA wobble position crucial for accurate reading of the genetic code
Source: PubMed Central journal article supplement (PMC4736104; doi:10.1038/ncomms10457), 2016-01-21
Supplement: ncomms10457-s1.pdf [file ncomms10457-s1.pdf]

1XMO / 30S / ASL-tRNA<sup>Lys</sup> / Paro

70S-tRNA<sup>Lys</sup> vs 30S / ASL<sup>Lys</sup> / Paro

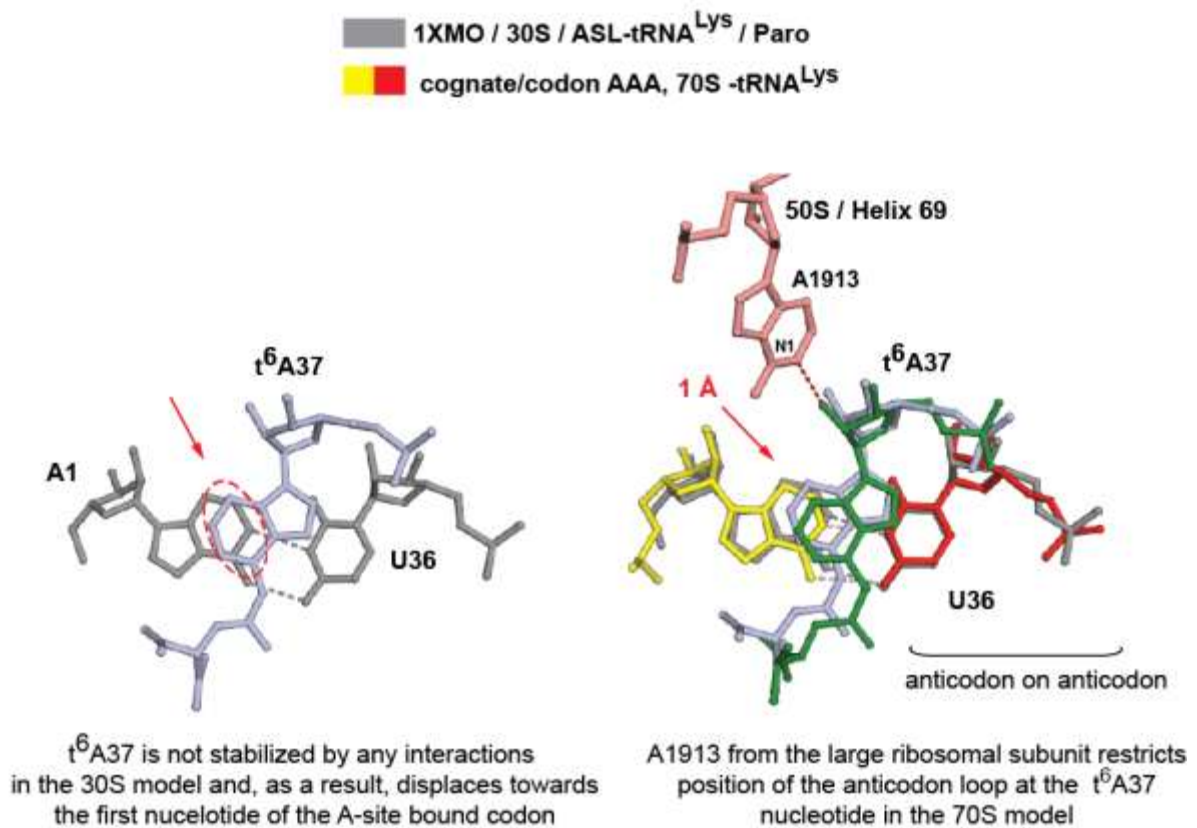

**Supplementary Figure 1. Different conformations of *E. coli* tRNA<sup>Lys</sup><sub>UUU</sub> anticodon loops in the partial model of the 30S subunit and complete structure of the 70S ribosome.** Comparison of the t<sup>6</sup>A37 stacking interactions in the model of the 30S subunit, which crystals were soaked with the synthetic ASL of *E. coli* tRNA<sup>Lys</sup><sub>UUU</sub>, hexanucleotide as an analogs of mRNA and miscoding antibiotic paromomycin (Paro)<sup>24</sup>, and complete system of the 70S ribosome co-crystallized with native *E. coli* tRNA<sup>Lys</sup><sub>SUU</sub> and long mRNA (current study; complex 2). The superposition shows a shift of t<sup>6</sup>A37 towards the first codon nucleoside in the 30S structure relatively to the position of t<sup>6</sup>A37 in the 70S model. The observed difference can be explained by the physical lack of a natural constraint from the large ribosomal subunit, i.e. fixation of t<sup>6</sup>A37 by A1913 from 23S rRNA, on the tRNA<sup>Lys</sup> ASL in the 30S model.

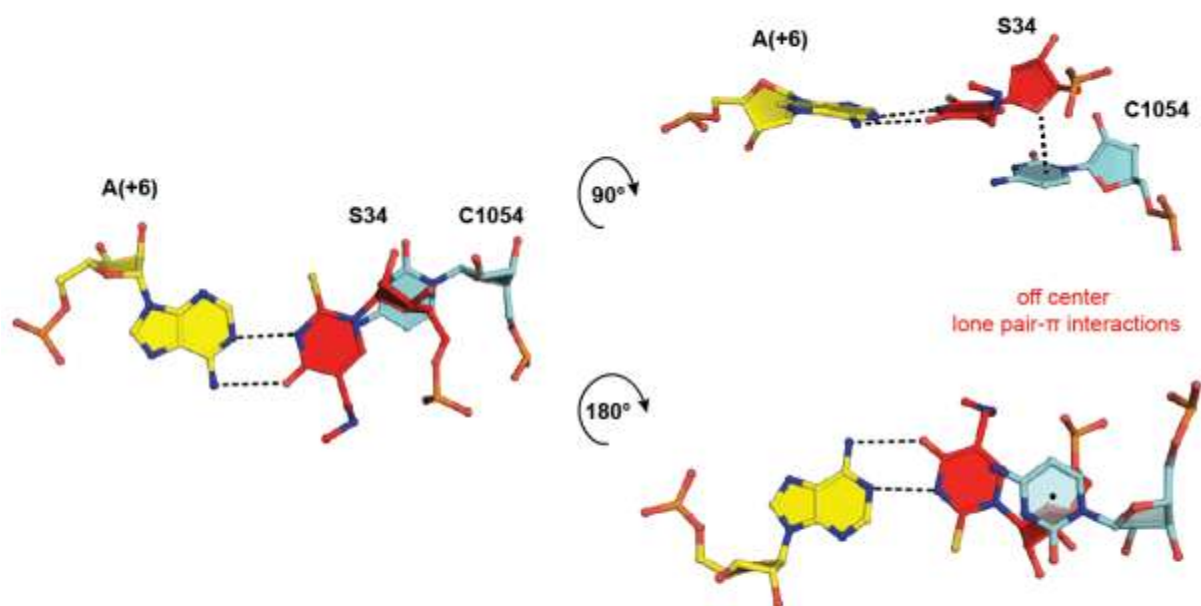

**Supplementary Figure 2. Lone pair-aromatic interactions between C1054 and S34.** Decoding center on the 70S ribosome controls the first anticodon nucleotide position S34 by weak lone pair- $\pi$  interactions with ribose of C1054 in 16S rRNA. Displayed are three projections, which show that the specified interaction is off-center.

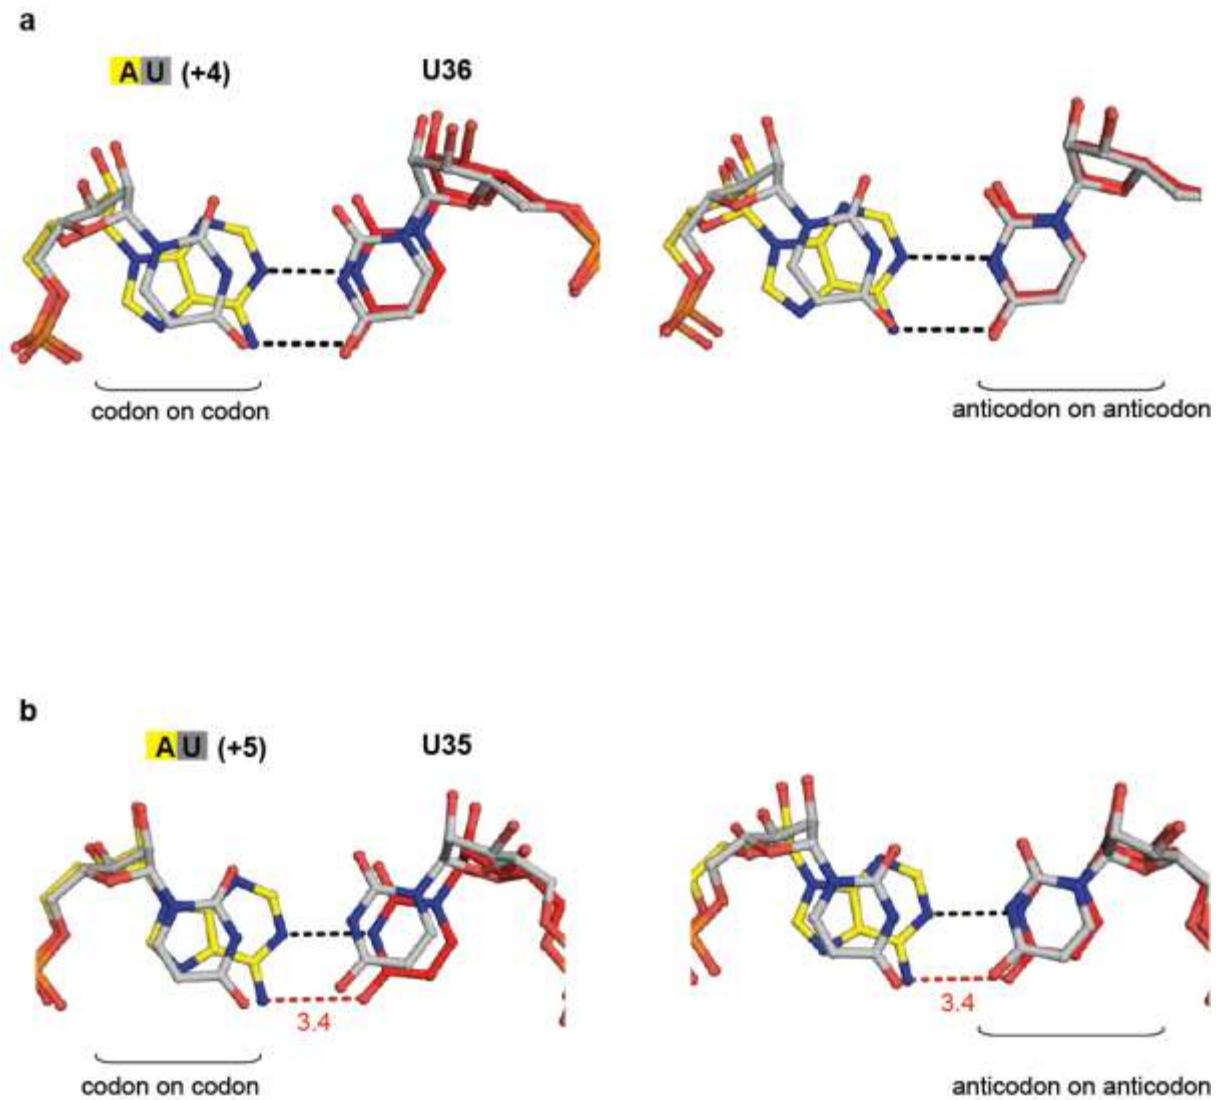

**Supplementary Figure 3. Comparison of a pyrimidine-pyrimidine mismatch with the canonical Watson-Crick pair in the decoding center of the 70S ribosome. (a, b)** Alignment of the Watson-Crick U•A pairs at the first (a, complex 1) and second (b, complex 2) codon-anticodon positions with similar structures where the codon nucleotide was substituted to uridine (complexes 3 and 4). In both U•U mismatches the interatomic distances between Watson-Crick edges of uridines are considerably larger than in canonical pairs (see the main text).

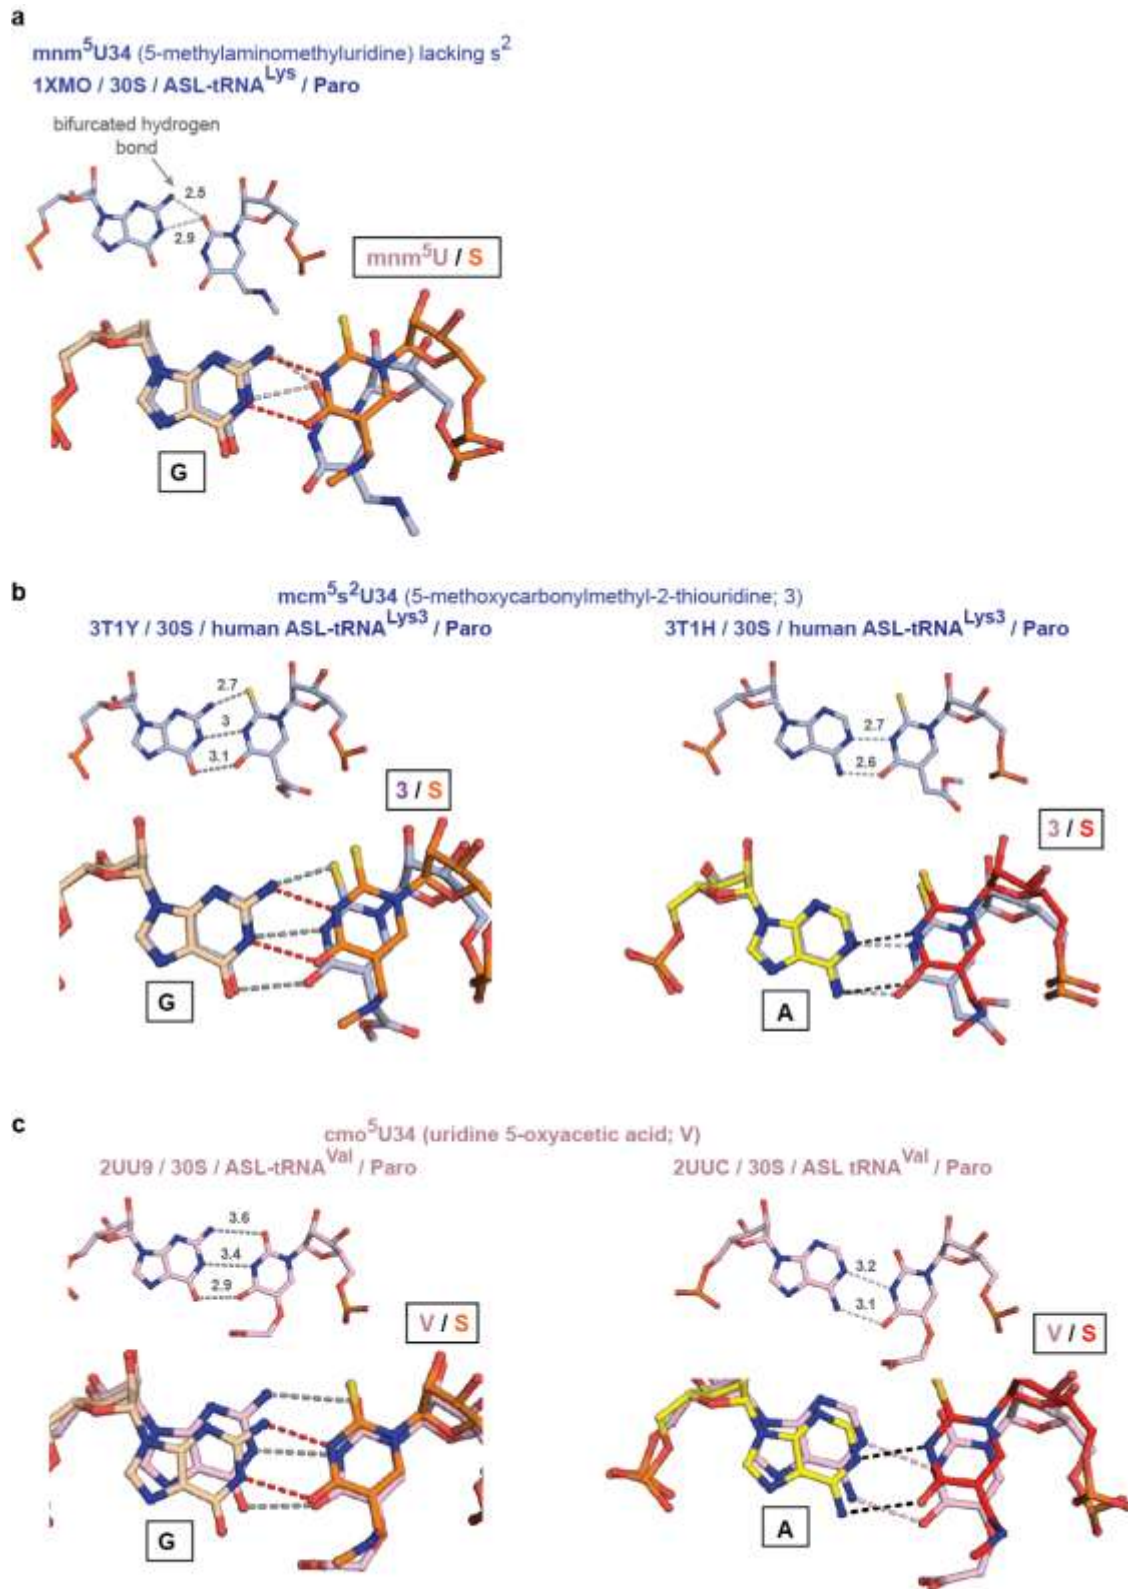

**Supplementary Figure 4. Comparison of S34•G and S34•A with other wobble pairs formed by hypermodified uridines.** (a) Lack of the thio group in  $\text{mnm}^5\text{s}^2\text{U}$  leads to a drastic change in position of the uracil ring in the 30S model; refer to ref. 25, where this structural data are challenged by the same authors. (b) The  $\text{mcm}^5\text{s}^2$  modification specific to one of the

eukaryotic species of lysine tRNA induces a Watson-Crick-like conformation of the  $mcm^5s^2U \cdot G$  wobble pair in the heterologous system with the bacterial small subunit (left). (c) The  $cmo^5U34$  of *E.coli* tRNA<sup>Val</sup><sub>UAC</sub> stimulates a C•G-like canonical interaction in the decoding center of the 30S subunit (left). In (b) and (c) the right panels show alignments of the S34•A pair with  $mcm^5s^2U34 \cdot A$  and  $cmo^5U34 \cdot A$ . In all cases the comparison is done by superposition of codons; each panel specifies the PDB code taken for comparison as well as the modification in ASL of tRNA; Paro stands for a miscoding antibiotic paromomycin used in all models of the 30S subunit to improve ASL binding. The difference in atom positions are indicated by arrows and corresponding value in angstroms.
